# Supplementary material for: West Nile Virus Epidemic in Germany Triggered by Epizootic Emergence, 2019
Source: PubMed Central journal article supplement (PMC7232143; doi:10.3390/v12040448), 2020-04-15
Supplement: viruses-12-00448-s001.pdf [file viruses-12-00448-s001.pdf]

Table S1. Epidemiological data of West Nile virus with full genome sequences (except for 1 human sample), their corresponding accession numbers and sequencing protocol performed.

| Accession Number | Virus identifier | Library number | Host common name       | Host scientific name            | City                                         | Region        | Sequencing Protocol |
|------------------|------------------|----------------|------------------------|---------------------------------|----------------------------------------------|---------------|---------------------|
| LR743437         | ED-I-90_18       | lib02896       | Great Grey Owl         | <i>Strix nebulosa</i>           | Poing                                        | Bavaria       | Direct NGS          |
| LR743434         | ED-I-114_18      | lib02898       | Great Grey Owl         | <i>Strix nebulosa</i>           | Poing                                        | Bavaria       | Direct NGS          |
| LR743433         | ED-I-82_18       | lib02914       | Goshawk                | <i>Accipiter gentilis</i>       | Klein Weissandt                              | Saxony-Anhalt | Direct NGS          |
| LR743429         | ED-I-142_18      | lib02916       | Tawny Owl              | <i>Strix aluco</i>              | Bad Lauchstaedt                              | Saxony-Anhalt | Direct NGS          |
| LR743436         | ED-I-89_18       | lib02959       | Goshawk                | <i>Accipiter gentilis</i>       | Bad Döben                                    | Saxony        | Direct NGS          |
| LR743443         | ED-I-107-18      | lib03041       | Snowy Owl              | <i>Bubo scandiacus</i>          | Berlin                                       | Berlin        | Direct NGS          |
| LR743425         | ED-I-62_19       | lib03378       | Snowy Owl              | <i>Bubo scandiacus</i>          | Friedrichsfelde<br>Lutherstadt<br>Wittenberg | Saxony Anhalt | Direct NGS          |
| LR743444         | ED-I-83_19       | lib03379       | Great Grey Owl         | <i>Strix nebulosa</i>           | Lutherstadt<br>Wittenberg                    | Saxony Anhalt | Direct NGS          |
| LR743424         | ED-I-85_19       | lib03380       | Snowy Owl              | <i>Bubo scandiacus</i>          | Berlin                                       | Berlin        | Direct NGS          |
| LR743442         | ED-I-87_19       | lib03381       | Blue Tit               | <i>Parus caeruleus</i>          | Halle (Saale)                                | Saxony-Anhalt | Direct NGS          |
| LR743428         | ED-I-118_19      | lib03382       | Snowy Owl              | <i>Bubo scandiacus</i>          | Berlin                                       | Berlin        | Direct NGS          |
| LR743426         | ED-I-157_19      | lib03415       | Snowy Owl              | <i>Bubo scandiacus</i>          | Friedrichsfelde                              | Berlin        | Direct NGS          |
| LR743432         | ED-I-158_19      | lib03416       | Andean Flamingo        | <i>Phoenicoparrus andinus</i>   | Berlin                                       | Berlin        | Direct NGS          |
| LR743427         | ED-I-148_19      | lib03417       | Goshawk                | <i>Accipiter gentilis</i>       | Berlin                                       | Berlin        | Direct NGS          |
| LR743423         | ED-I-156_19      | lib03418       | Goshawk                | <i>Accipiter gentilis</i>       | Berlin                                       | Berlin        | Direct NGS          |
| LR743435         | ED-I-153_19      | lib03419       | Goshawk                | <i>Accipiter gentilis</i>       | Friedrichsfelde<br>Brieselang                | Brandenburg   | Direct NGS          |
| LR743422         | ED-I-155_19      | lib03420       | Goshawk                | <i>Accipiter gentilis</i>       | Neuruppin                                    | Brandenburg   | Direct NGS          |
| LR743430         | ED-I-89_19       | lib03421       | Blue Tit               | <i>Parus caeruleus</i>          | Radebeul                                     | Saxony        | Direct NGS          |
| LR743421         | ED-I-139_19      | lib03422       | Great Tit              | <i>Parus major</i>              | Dresden                                      | Saxony        | Direct NGS          |
| LR743431         | ED-I-177_19      | lib03423       | Eurasian Golden Plover | <i>Pluvialis apricaria</i>      | Kamenz/Biehla                                | Saxony        | Direct NGS          |
| LR743449         | ED-I-163_19      | lib03424       | Goshawk                | <i>Accipiter gentilis</i>       | Sandersdorf                                  | Saxony-Anhalt | Direct NGS          |
| LR743458         | ED-I-164_19      | lib03425       | Snowy Owl              | <i>Bubo scandiacus</i>          | Magdeburg                                    | Saxony-Anhalt | Direct NGS          |
| LR743451         | ED-I-165_19      | lib03426       | Snowy Owl              | <i>Bubo scandiacus</i>          | Magdeburg                                    | Saxony-Anhalt | Direct NGS          |
| LR743446         | ED-I-109_19      | lib03427       | Coconut Lorikeet       | <i>Trichoglossus haematodus</i> | Halle (Saale)                                | Saxony-Anhalt | Direct NGS          |
| LR743456         | ED-I-134_19      | lib03428       | House Sparrow          | <i>Passer domesticus</i>        | Rackwitz                                     | Saxony        | Direct NGS          |
| LR743445         | ED-I-172_19      | lib03430       | Great Grey Owl         | <i>Strix nebulosa</i>           | Chemnitz                                     | Saxony        | Direct NGS          |
| LR743452         | ED-I-173_19      | lib03431       | Great Grey Owl         | <i>Strix nebulosa</i>           | Chemnitz                                     | Saxony        | Direct NGS          |
| LR743450         | ED-I-202_19      | lib03432       | Chilean Flamingo       | <i>Phoenicopterus chilensis</i> | Leipzig                                      | Saxony        | Direct NGS          |
| LR743454         | ED-I-205_19      | lib03433       | Great Tit              | <i>Parus major</i>              | Bad Döben                                    | Saxony        | Direct NGS          |
| LR743448         | ED-I-201_19      | lib03449       | Humboldt-Penguin       | <i>Spheniscus humboldti</i>     | Cottbus                                      | Brandenburg   | Direct NGS          |
| LR743457         | ED-I-208_19      | lib03450       | Goshawk                | <i>Accipiter gentilis</i>       | Merseburg                                    | Saxony-Anhalt | Direct NGS          |

|          |               |          |               |                             |                        |               |                                   |
|----------|---------------|----------|---------------|-----------------------------|------------------------|---------------|-----------------------------------|
| LR743453 | ED-I-94_19    | lib03451 | Horse         | <i>Equus ferus caballus</i> | Krostitz               | Saxony        | Direct NGS with MyBaits treatment |
| LR743455 | C6_T167_20    | lib03481 | Mosquito      | <i>Culex pipiens</i>        | Berlin Friedrichsfelde | Berlin        | Direct NGS                        |
| LR743447 | C6_T167_57    | lib03482 | Mosquito      | <i>Culex pipiens</i>        | Berlin Friedrichsfelde | Berlin        | Direct NGS                        |
| MN794935 | BNI-10/19     | BNI42493 | Human         | <i>Homo sapiens</i>         | Leipzig                | Saxony        | Direct NGS                        |
| MN794936 | BNI-Berlin748 | BNI45435 | Human         | <i>Homo sapiens</i>         | Berlin                 | Berlin        | Direct NGS                        |
| MN794937 | BNI-2635      | BNI41487 | Blackbird     | <i>Turdus merula</i>        | Schönebeck             | Saxony-Anhalt | Direct NGS                        |
| MN794938 | BNI-2615      | BNI41323 | House sparrow | <i>Passer domesticus</i>    | Jeßwitz                | Saxony-Anhalt | Direct NGS                        |
| MN794939 | BNI-2432      | BNI40119 | Dunnock       | <i>Prunella modularis</i>   | Hamburg                | Hamburg       | Direct NGS                        |
